# Supplementary material
Source: PubMed Central journal article supplement (PMC2860794)

**Supplementary Figure 1a: Linkage disequilibrium ( $r^2$ ) between SNPs downstream of *MC4R* in the CEU HapMap dataset.** The strength of linkage disequilibrium ( $r^2$ ) between SNPs is represented by the depth of shading.

**CEU**

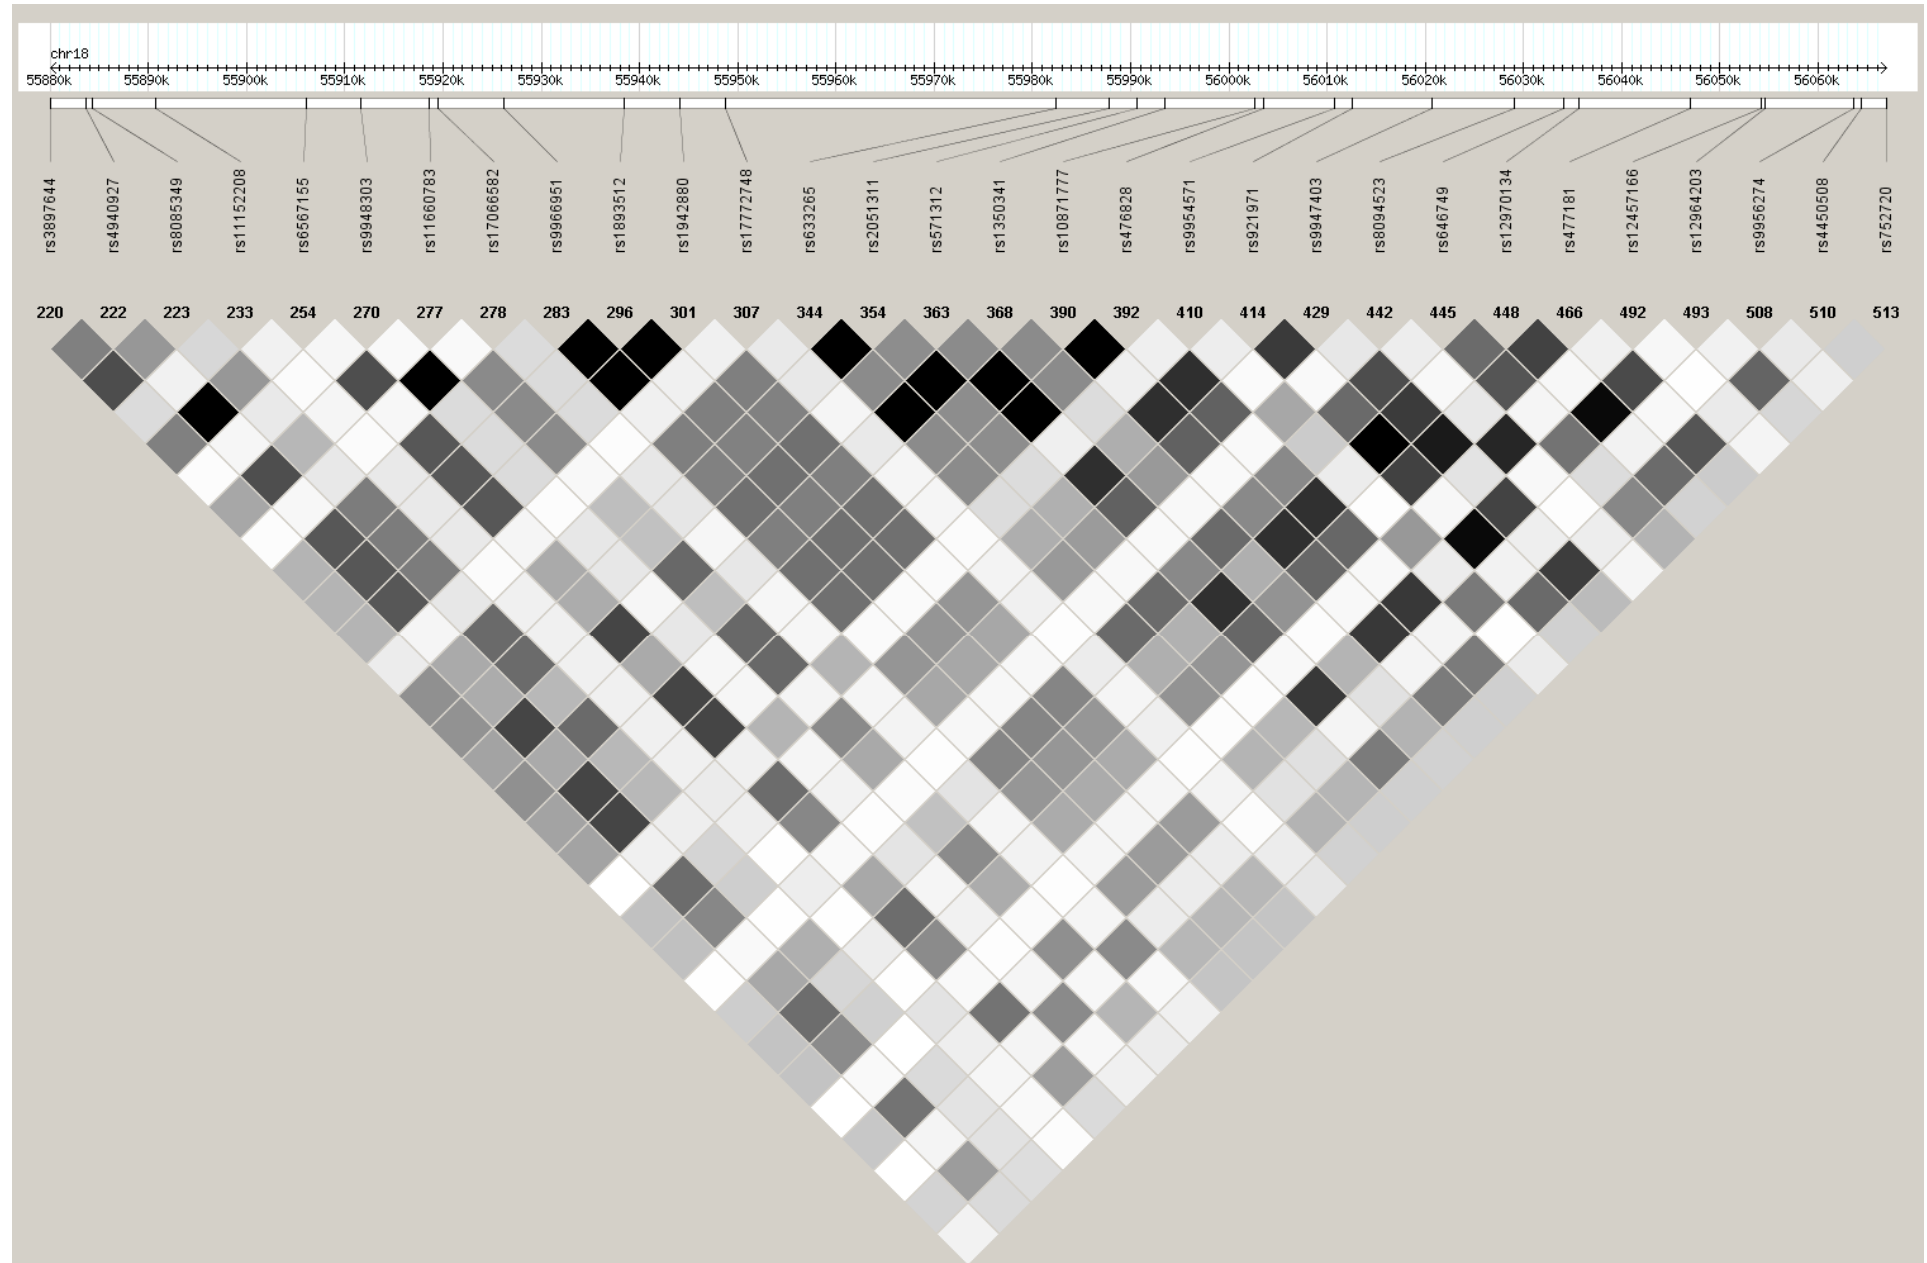

**Supplementary Figure 1b: Linkage disequilibrium ( $r^2$ ) between SNPs downstream of *MC4R* in the YRI HapMap dataset.** The strength of linkage disequilibrium ( $r^2$ ) between SNPs is represented by the depth of shading.

**YRI**

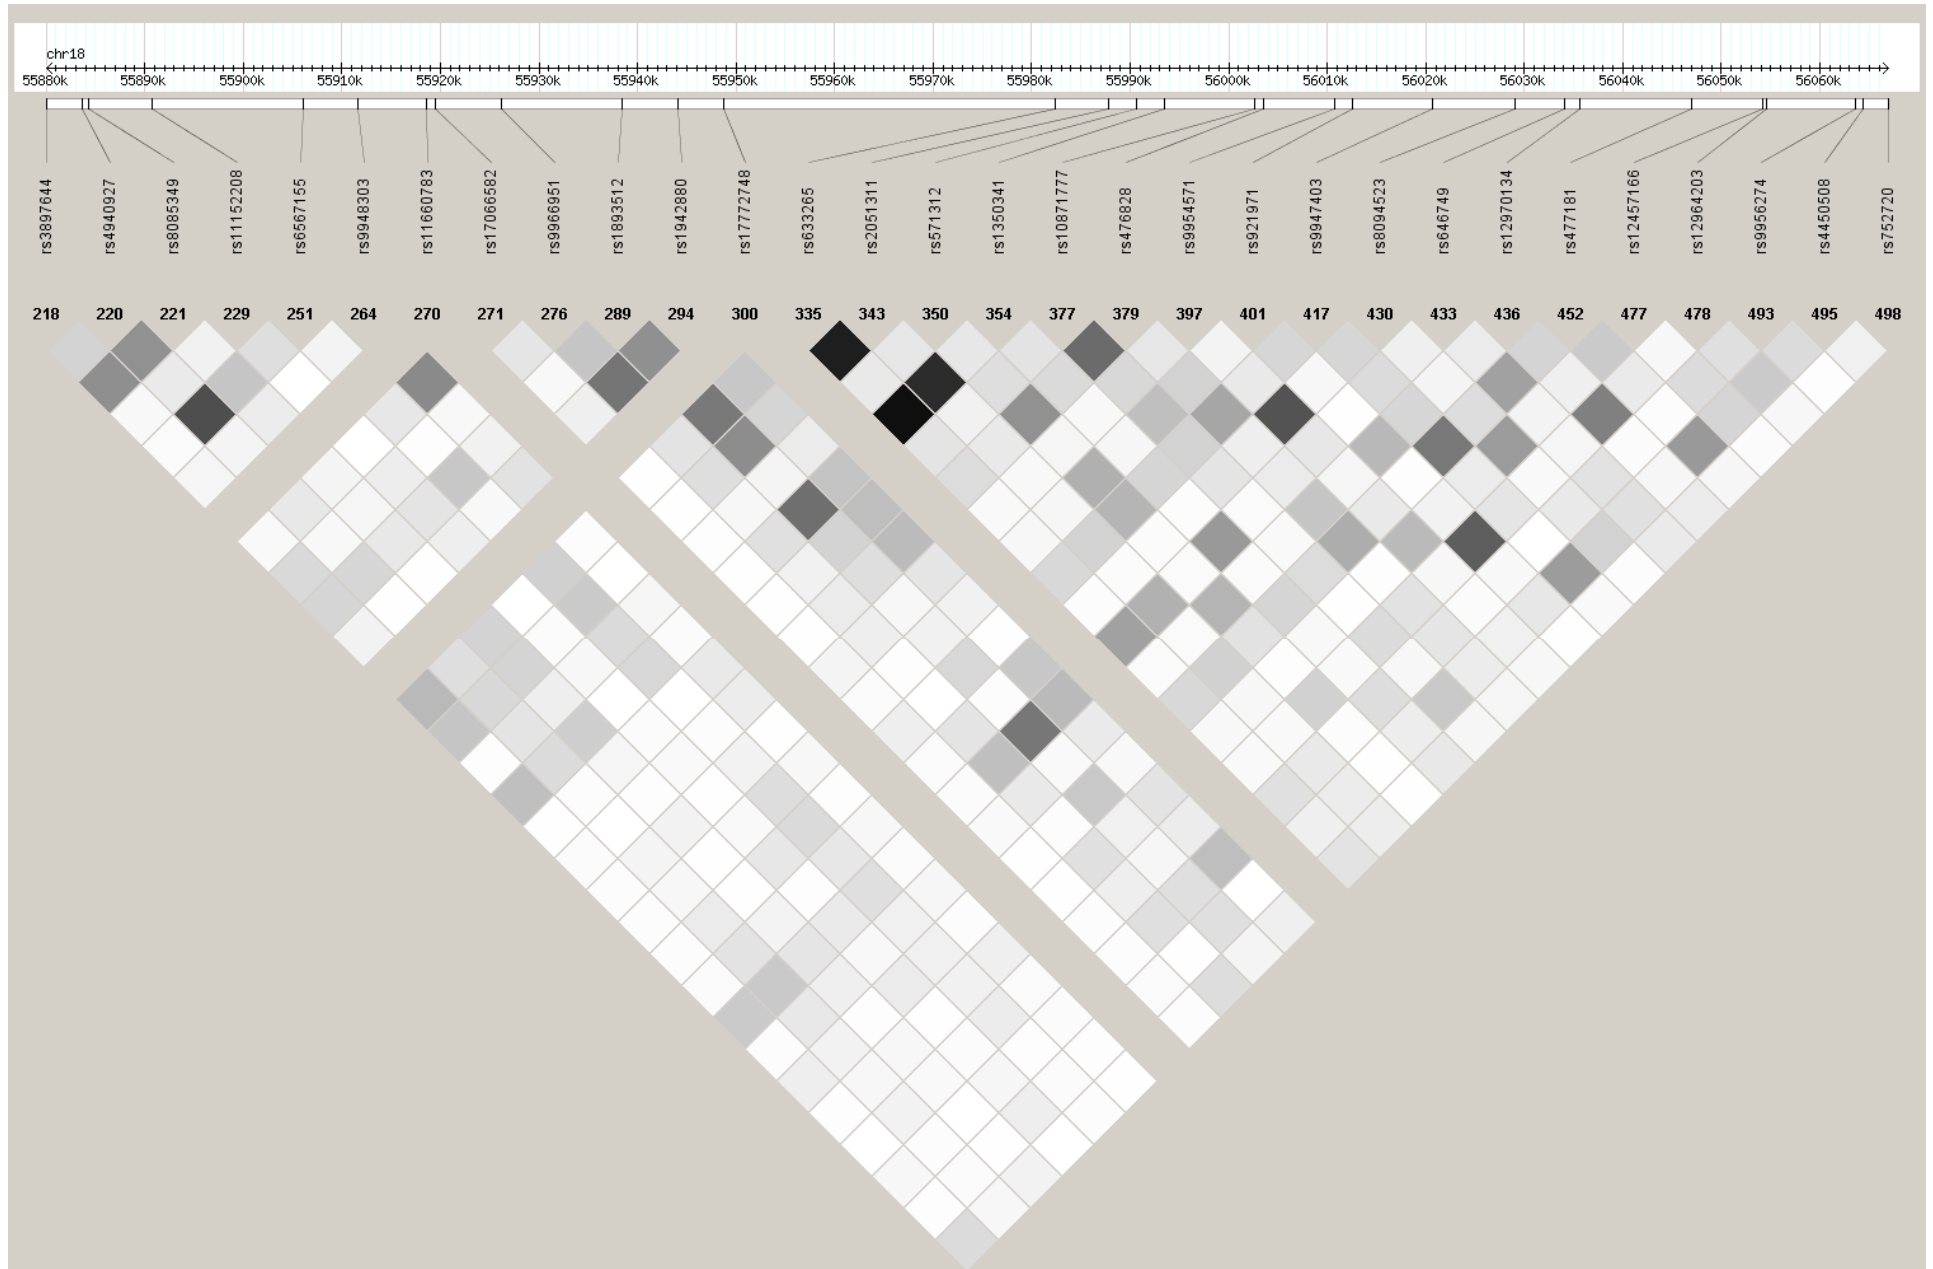

Supplement: NIHMS195991-supplement-Supplementary_Figure__1.pdf [file NIHMS195991-supplement-Supplementary_Figure__1.pdf]
